# Supplementary material for: Evidence of the Involvement of a Plus-C Odorant-Binding Protein HparOBP14 in Host Plant Selection and Oviposition of the Scarab Beetle Holotrichia parallela
Source: MDPI journal article supplement (doi:10.3390/insects12050430), 2021-05-10
Supplement: s1 [file s1]

**Table S1. Primer pairs used for the manuscript**

| Name                       | Primer sequences                                                                |
|----------------------------|---------------------------------------------------------------------------------|
| <i>HparOBP1 (RT-qPCR)</i>  | Forward: 5'-TGTGTGGTAGCTTGCGTAAA-3'<br>Reverse: 5'-TGTTACATTCGTCGCTATCG-3'      |
| <i>HparOBP3 (RT-qPCR)</i>  | Forward: 5'-TGCATAAGGGAATCTGGAAT-3'<br>Reverse: 5'-AGAGTCAGCGCACCCCTCCA-3'      |
| <i>HparOBP6 (RT-qPCR)</i>  | Forward: 5'-AATGCGTACTGGTGTGGAA-3'<br>Reverse: 5'-CTCGCAACTATCATCATCAC-3'       |
| <i>HparOBP10 (RT-qPCR)</i> | Forward: 5'-TCATAGATAAGGCCGACGCA-3'<br>Reverse: 5'-TTGCACAGATCGAGAATCGC-3'      |
| <i>HparOBP12 (RT-qPCR)</i> | Forward: 5'-TTCATGCCTCTTCAAAAAAT-3'<br>Reverse: 5'-TATGGCTGGGCGTTTATAGAT-3'     |
| <i>HparOBP13 (RT-qPCR)</i> | Forward: 5'-GATTACGGCGTATTTGCG-3'<br>Reverse: 5'-TCGTAAGCTGTTTCACATGA-3'        |
| <i>HparOBP14 (RT-qPCR)</i> | Forward: 5'-TCCAGGAGCTGTTGCTATAATG-3'<br>Reverse: 5'-TTAATGGTCCTCTGATTTGTGAA-3' |
| <i>HparOBP15 (RT-qPCR)</i> | Forward: 5'-GGGAAAGGTAGGTGCGTC-3'<br>Reverse: 5'-CCTCCAAGGTCTTCAAAGTG-3'        |
| <i>HparOBP16 (RT-qPCR)</i> | Forward: 5'-TATGCGTTGCAGAATGTATG-3'<br>Reverse: 5'-CGCTTCTTTGCTTCTGCTA-3'       |
| <i>HparOBP23 (RT-qPCR)</i> | Forward: 5'-ACAGTGAAGGATCAAAAGGG-3'<br>Reverse: 5'-TGGATTGGCACCAGGTATTA-3'      |
| <i>HparOBP26 (RT-qPCR)</i> | Forward: 5'-CCGATGAGTGTTTGCAAGAG-3'<br>Reverse: 5'-CAAAGTTTACAGAAACGCCA-3'      |
| <i>HparOBP27 (RT-qPCR)</i> | Forward: 5'-GTTCTCGTTTTCGCTCTACA-3'<br>Reverse: 5'-GTCACCAAATACGCGTTGTC-3'      |
| <i>HparOBP29 (RT-qPCR)</i> | Forward: 5'-ACTGTCTCAAATCCAGCGAA-3'<br>Reverse: 5'-CGAAGTCGTAAAAGTCCAAG-3'      |
| <i>HparOBP33 (RT-qPCR)</i> | Forward: 5'-TGGAAGAATTAGCCAAACAA-3'<br>Reverse: 5'-TGGTTCTGCTTTCGCTTTAT-3'      |
| <i>HparOBP34 (RT-qPCR)</i> | Forward: 5'-GCCATGTTGACTACGATTCA-3'<br>Reverse: 5'-AAACATTTGCAAATTCATG-3'       |
| <i>HparOBP35 (RT-qPCR)</i> | Forward: 5'-TTGTCACTGCGCTTTGGGTA-3'<br>Reverse: 5'-GTCAACCCTTCTCCCGCATT-3'      |
| <i>HparOBP36 (RT-qPCR)</i> | Forward: 5'-CTTGCAAAACAAAAGGGAAA-3'<br>Reverse: 5'-AGGCGGTAAAATAGCGGA-3'        |
| <i>HparOBP37 (RT-qPCR)</i> | Forward: 5'-TGCCTGGCGACTATGAAACT-3'<br>Reverse: 5'-ACGCACTTGAAGAAAGCATA-3'      |
| <i>HparOBP38 (RT-qPCR)</i> | Forward: 5'-TTGCTCGAGGATGAAAGTGA-3'<br>Reverse: 5'-CAAGCACTTATCCTCGTTCT-3'      |
| <i>HparOBP39 (RT-qPCR)</i> | Forward: 5'-AGTCCGTTGCCTGGCTGG-3'<br>Reverse: 5'-CGGGAATTGATTATGCGTTG-3'        |
| <i>GADPH</i>               | Forward: 5'-AATACCTTTTAGTGGTCCCTCCG-3'<br>Reverse: 5'-TGCATGCTATCACAGCTACGC-3'  |

|                            |                                                                                                                                            |
|----------------------------|--------------------------------------------------------------------------------------------------------------------------------------------|
| <i>HparOBP14 (cloning)</i> | Forward: 5'-CGGGATCCTATG<br>ATTTTGAAGATCACGCAT-3'<br>Reverse: 5'-CCCAAGCTTCA<br>CCACCTATACGTTGTTAG-3'                                      |
| <i>dsOBP14</i>             | Forward: 5'-GGATCCTAATACGACTCACTA<br>TAGGATTTTGAAGATCACGCATATAAT-3'<br>Reverse: 5'-GGATCCTAATACGACTCACTA<br>TAGGGACATTCCAGTTGTATTTCTTTC-3' |
| <i>dsGFP</i>               | Forward: 5'-GGATCCTAATACGACTCACT<br>ATAGGCTACCAGCCAAATCTAAACG-3'<br>Reverse: 5'-GGATCCTAATACGACTCAC<br>TATAGGGCTAACCGAGAAAAGATGAC-3'       |

*Bam*HI and *Hind*III restriction sites marked with double underline.

GGATCCTAATACGACTCACTATAGG is the enhancer and T7 promoter sequence, which is required for dsRNA synthesis.

## Supplementary Figures

1 ATGAAGTTCGTTATTGTTCTATTATTATCTGCCCTTGCATTTATCAATGCTTATGATTTT  
1 M K F V I V L L L S A L A F I N A Y D F  
61 GAAGATCACGCATATAATGAAC TATTAGTTGAACAATATTCTCTCGCCCATCCAAGACTA  
21 E D H A Y N E L L V E Q Y S L A H P R L  
121 CGAAGAGCCGCAGAAAATAACTGCATAGATTCCAGGAGCTGTTGCTATAATGATGCCGTA  
41 R R A A E N N C I D S R S C C Y N D A V  
181 CCACAATATCACGCTAATGAAACAGAAGAGTGCTCGAAAGAACTAGGTTTCGATCGTTCA  
61 P Q Y H A N E T E E C S K E L G F D R S  
241 CAAATCAGAGGACCATTAACTGATGCACAAATAAATCAAATTAATGTCTTGCTGAATGT  
81 Q I R G P L T D A Q I N Q I K C L A E C  
301 ATTTCCAAGAAGAAGGGACATTTTCGACGCCGATGGTAACCTATTGAAAGATGAACTGTTG  
101 I S K K K G H F D A D G N L L K D E L L  
361 AAGGATATCAGGAAACCCTTAGAACAGGTAGCGTGGTTGAAGCCAAAAGTTGAGGATATA  
121 K D I R K P L E Q V A W L K P K V E D I  
421 TTTAATAAATGCTTGGATGGTCTACCTACGAAAGTACCAGAGAATCAATGCAATGACATT  
141 F N K C L D G L P T K V P E N Q C N D I  
481 GGCATGACGATTGGACATTGTATTTGGAAAGAAATACAAC TGGAAATGTCCAAAGGATAGA  
161 G M T I G H C I W K E I Q L E C P K D R  
541 CAAGCAAATCTTGAAAAATGTGAGGCGCTTCAAGTATATTTGAAGGAGAACAAAGGCTTTC  
181 Q A N L E K C E A L Q V Y L K E N K A F  
601 CCACCACCACCACCTATACGTTGTTAG  
201 P P P P P I R C

**Figure S1.** Nucleotide sequence and deduced amino acid sequence of HparOBP14 from *H. parallela*. The signal peptide is represented by a single underscore, and the start codon and stop codon are represented by a rectangle.

|             |                                                                                                       |     |
|-------------|-------------------------------------------------------------------------------------------------------|-----|
| HparOBP14   | .MKFVIVLLLSALAFIN...AYDEFTHAYNELIVEQYS.....LAHPRLRAAENNC.....IDSRS.....CCYNDAVPQYHAN...ETEECSK        | 73  |
| HparOBP16   | .MNKILVSTVILGIAS...AYDESDAYFNQLITKEFDDLTLSE.SSIAHPRARRDDEAAK...CHHKH...KECCAEDLLFELYDKIRDMKKECLK      | 86  |
| AcorOBP11   | .MKTSTITLFLCALAAVN...AYEEDQAYNQLIAEELH.....PLHYRGARDTQKC.....IDQNS.....CGSGPPISNFHASDKEASQCSK         | 76  |
| AcorOBP13   | .MKNIVLVSSLLGLSS...AYDFSDEFNQLLSQEYDDFASGE.SVFLHPRVRRDDDEASK.....CHHRH...KECCGDELMKSLHDKYRDTKRECFK    | 86  |
| DponOBP2    | .MNKLVTLVAVLLGAACHLVQTYDFQDATFNEILLSDFEDIFDTLDNTYLHPRAKRNEEAVNSDEKCRRRHHRKPKLCCGEDVLDLSLQEKKEIVRLCFK  | 99  |
| AchiOBP3    | .MNNVAFECALLVATVS...AYNFEDPDFNILLSDDLEELSSGV.ASFSHPRSRRDDDEAVN.DKDKCHHRKRWGELCOAEDVVAKMRDVEKDLKRECFK  | 93  |
| CbowOBP25   | MYYALLPRSAVLAVIIVVVA.AYNFEDTEFNQILANLEEDVYS...FTYSHPRSRRDDKAVEEDKCHPPRRGR..PLCCAEETMRKLHDDKKEIKRACFK  | 94  |
| TcasOBP5E   | .MNNQIAVVTFLIAVAALTA.AYEFNDPLFNQILANLEVELES...SAYPHRSRRDEDAVT.EKCRPFRRK...KLCCAEETFEDELHDKDRDFKRECFK  | 91  |
| AgamOBPjj7A | ..MLKLALFVGLVGCVV...AYDFQDSFYNEVIMEDLLDNAD...EPIMFGRFRRSASEVQ..DDKCKRKYK...CCNDANTENMEKIH.EIKKQCFM    | 84  |
| DmelOBP49a  | ...MLSKSQLLLLVVG...FCLNAAVSAEVDCKSRP.....SFVNPKT.....CCPMPDEFVTAECLKCKIFMTMP                          | 60  |
|             | ** C1                                                                                                 |     |
| HparOBP14   | ELGFD.RSQIRG.....PTDAQINQ...IKLAEICISKKKGHFDADGNLLKDELLKDIRKPLEQVAVLKPKVEDIFNKLGLDGLPTKVE....         | 154 |
| HparOBP16   | EVTG..KEFHGG.....PPTCEELEQRKKEMICVABCMGKKKGVLADAGNIKEEELKKSVEKSSMSGLDWQPLMDDVITKCLAEAKEAADKREA.       | 174 |
| AcorOBP11   | EVNFN.RGSIRG.....PTAEQKQD...IKLAEICIGKKKGYLTADELKIDKLLSSMKERLQSVAVLAPKLSMFELCLPQNETAKQP...            | 158 |
| AcorOBP13   | QVTG..KEFGGG.....PPTCEELEERKKEMICVABCMGKKKGAVDDKGNKEDEVKKLVAECTAELEWFKPMLDEVTTKCLAEAKAAAEKYDK.        | 174 |
| DponOBP2    | DTGGVKEKSPDRGFGNHRNFDLSCAEAVEKRRKSDMICVEGCKLQCKGLVSDDGSPKEQISTYLYKEAFTTQTWFEKVSQGVVEKGVNEAINTATKNPVKF | 199 |
| AchiOBP3    | EVVG...KDKHDK.....FDPENCETMDQKKQIVVIEGVGKKKDLLTEGPNKEEFERSFLKESFSESSEWLAALQDKVISTCLDEGKNATANDAS       | 183 |
| CbowOBP25   | EITG..KEKPERPDRHHGPPDFPSCKEIKQHRDMNCIQCQGVGEKLDYLDADGPKPEQFEKYVEGIFEKEDYLLPLKDKIVSVGLDEAKNATEKVSS.    | 191 |
| TcasOBP5E   | QVVG.S.KDGPPE.....FDPFRCDKVDKHRDMTICVSCQVQCKKDVLLKDKGNVKEAEGFGEFVKETMAKESWFSVSIQDKVVSTGLAEARNAATANDTS | 182 |
| AgamOBPjj7A | EVNR..KNKADG...AYEPVDFESCERLNKTKMEVTCAMEGVGKKKEVVNEDGLIEPKLMEFVKSNFAADDWQQPLLAGHIETGVKEAKEKAAMPR.     | 177 |
| DmelOBP49a  | PPPP..DGEASG.....SESKRHHHPHPPECFFSIFNETGIYQ.NRKLDKAKLNAYLQEVFEEDSSDLQTATQATLTATKVAIDFEANLPPR          | 147 |
|             | C2 C3 C4                                                                                              |     |
| HparOBP14   | .....NCCNDIGMTIGFCIWKEIQLECKDRQANLEKCEALQVYLKE.NKAFPPPPPIRC.....                                      | 208 |
| HparOBP16   | .....GCCNPSDLKLVRCFFKEIQLSCEADQIKDQABDALRESVKK...HDFPPPH.....                                         | 223 |
| AcorOBP11   | .....KKCNVDGLTVGCIWQIQIQELNEQONPONCKNLQEYILT.HNQFPAPPVVK.....                                         | 212 |
| AcorOBP13   | .....KCCNPSDIKFSICIFKEIQLNCEADQIKDQERCDAMRASLKK...HDFPPVH.....                                        | 223 |
| DponOBP2    | YTB.....GNKICSRSGIVLKECLNSIQLSCEAGQIKDKNACERFQERAKKGKDLFDQPPGPPFDDNREEQ                               | 267 |
| AchiOBP3    | DS.....TSCNPAGIKIAECLHREIQLNCEADQIKDEKSCARLQERLKR.RDFHFPFPPPGGFDEPDN..                                | 245 |
| CbowOBP25   | .....DFCKSTGLVLEECIFINTQLNCEADQIKDKKNSKQFDRLRQGGDKRSSPFE...AEDE...                                    | 248 |
| TcasOBP5E   | DT.....ESCNPAVGKLMCMFERIQLCCETEQIKDKQKARARDKIKR.HNEFLPPPPQ...FLNDE...                                 | 241 |
| AgamOBPjj7A | .....EAGCSCSETSNFEGYCMWRQMALACEKDKQVANKHCDRIREKIANNEPLHYKAELEDM.....                                  | 235 |
| DmelOBP49a  | PAPSPPPGFPCPHDAGHLMCGVFRNMKNKCEDSIRNDSQCTDMKEFFTKCKPPRGPPPSAEDM.....                                  | 212 |
|             | C4a C5 C6P C6a                                                                                        |     |

**Figure S2.** Alignment of the deduced amino acid sequence of HparOBP14 with homologous proteins from other OBPs. The eight conserved Cys residues are labelled by 'C'. '\*' indicates the conserved cysteine residue before C1. The species are *Anomala corpulenta* (Acor), *Anoplophora chinensis* (Achi), *Dendroctonus ponderosae* (Dpon), *Tribolium castaneum* (Tcas), *Colaphellus bowringi* (Cbow), *Anopheles gambiae* (Agam) and *Drosophila melanogaster* (Dmel). Their GenBank accession numbers are AcorOBP11 (AKC58532.1), AcorOBP13 (AKC58534.1), HparOBP16 (AKI84374.1), AchiOBP3 (AUF72950.1), CbowOBP25 (ALR72513.1), DponOBP2 (AKK25130.1), TcasOBP5E (EFA03231.1), AgamOBPjj7A (EAA43809), DmelOBP49a (NP\_610812.1).

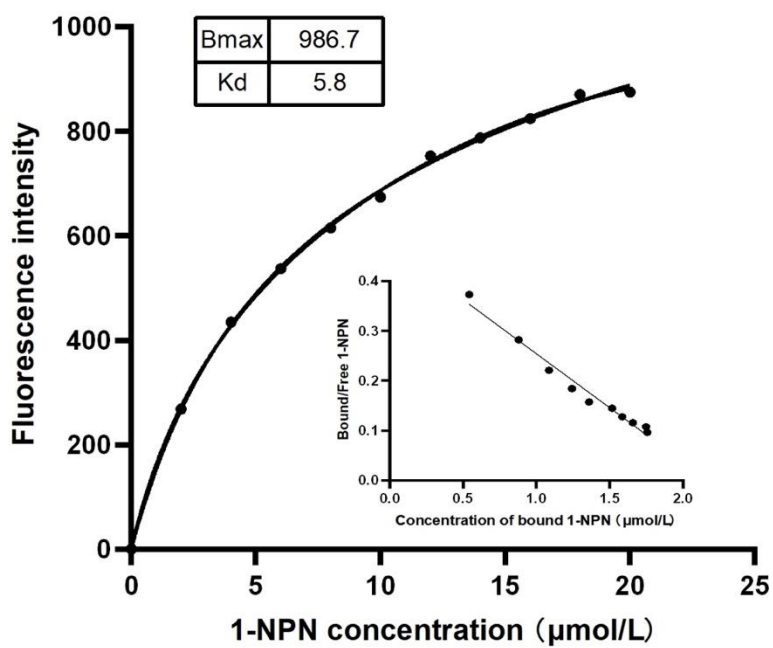

**Figure S3.** Binding curve and Scatchard plots of HparOBP14 protein with fluorescent probe 1-NPN.
